# Supplementary material for: Effective Adsorptive Removal of Coomassie Violet Dye from Aqueous Solutions Using Green Synthesized Zinc Hydroxide Nanoparticles Prepared from Calotropis gigantea Leaf Extract
Source: MDPI journal article supplement (doi:10.3390/chemengineering7020031), 2023-04-06
Supplement: s1 [file s1]

## Article

# Effective Adsorptive Removal of Coomassie Violet Dye from Aqueous Solutions Using Green Synthesized Zinc Hydroxide Nanoparticles Prepared from *Calotropis gigantea* Leaf Extract

Vairavel Parimelazhagan <sup>1,\*</sup>, Kannan Natarajan <sup>2</sup>, Srinath Shanbhag <sup>1</sup>, Sumanth Madivada <sup>1</sup> and Harish S. Kumar <sup>1,\*</sup>

## Supplementary Materials

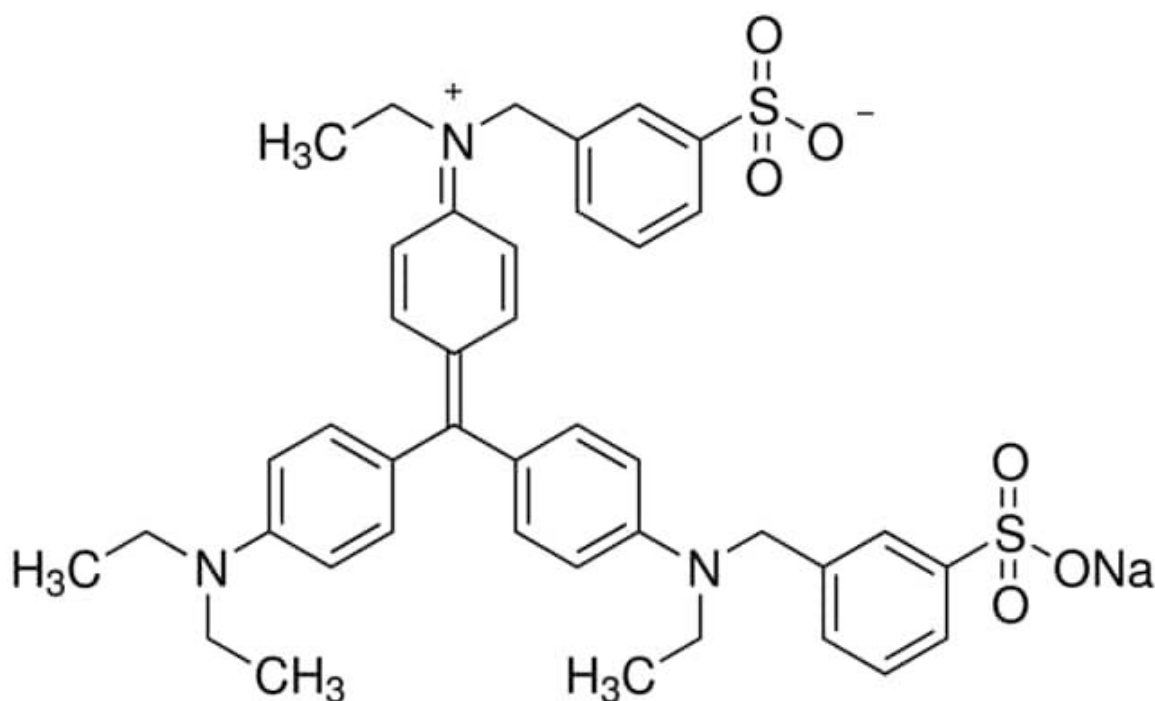

Figure S1. Chemical structure of Coomassie violet (CV) dye.

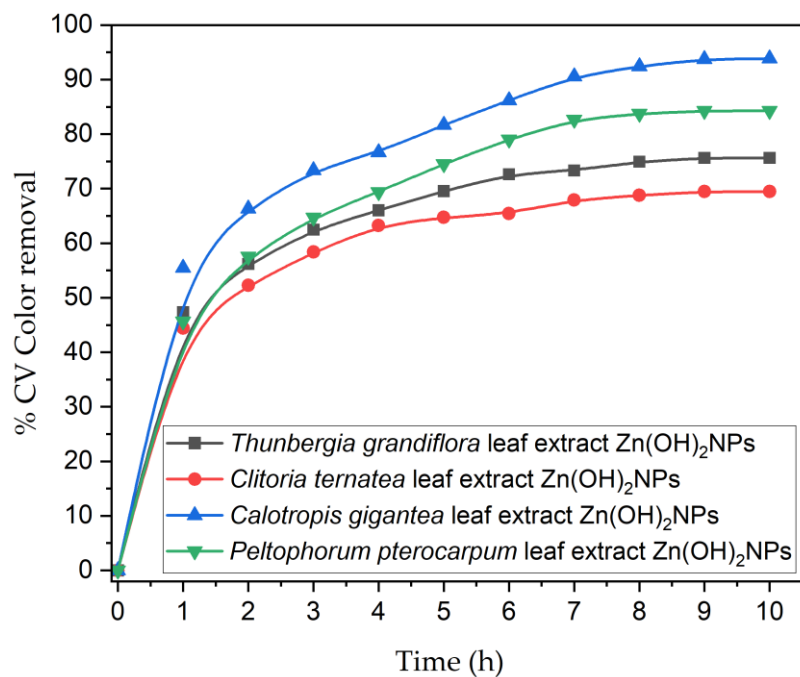

**Figure S2.** Selection of suitable plant leaf extract zinc hydroxide nanoparticles for the removal of CV dye from wastewater. (Initial pH: 2; initial dye concentration: 100 mg L<sup>-1</sup>; plant leaf extract nanoparticle adsorbent dosage: 5 g L<sup>-1</sup>; adsorbent particle size: < 150  $\mu$ m; agitation speed: 150 rpm; contact time 10 h; temperature: 299 K

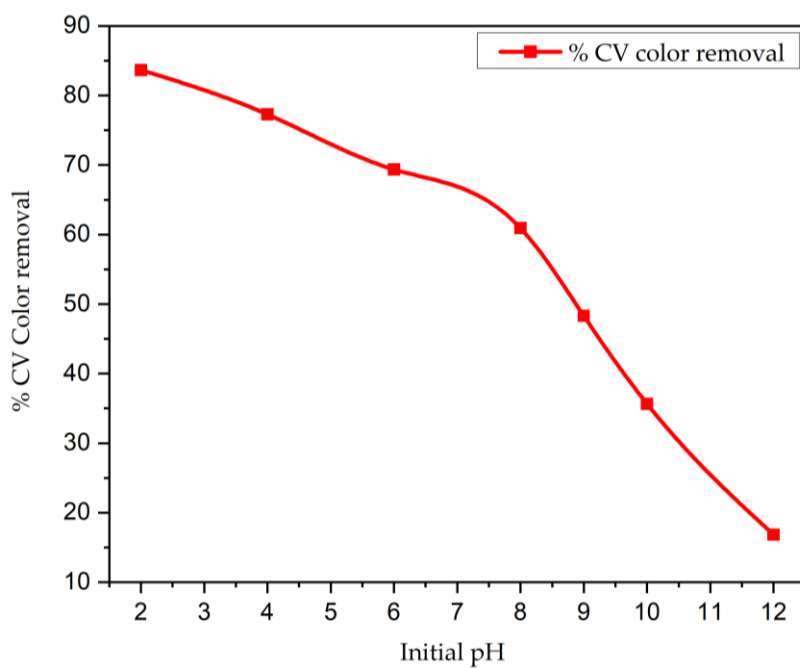

**Figure S3.** Effect of initial pH on decolorization of CV dye using *Calotropis gigantea* leaf extract zinc hydroxide nanoparticles (CG-Zn(OH)<sub>2</sub>NPs) adsorbent. (Initial dye concentration: 200 mg L<sup>-1</sup>; CG-Zn(OH)<sub>2</sub>NPs adsorbent dosage: 6 g L<sup>-1</sup>; adsorbent particle size: 65.38  $\mu$ m; shaking speed: 150 rpm; temperature: 299 K; contact time: 8 h)

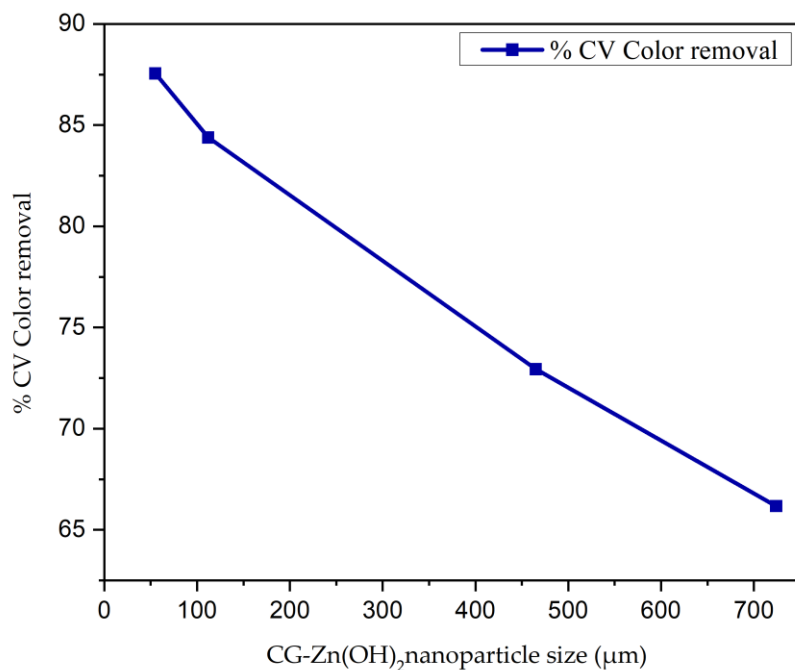

**Figure S4.** Effect of CG-Zn(OH)<sub>2</sub> nanoparticle size on CV dye decolorization. (Initial pH: 2; initial dye concentration: 200 mg L<sup>-1</sup>; CG-Zn(OH)<sub>2</sub>NPs adsorbent dosage: 6 g L<sup>-1</sup>; shaking speed: 150 rpm; temperature: 299 K; contact time: 8 h)

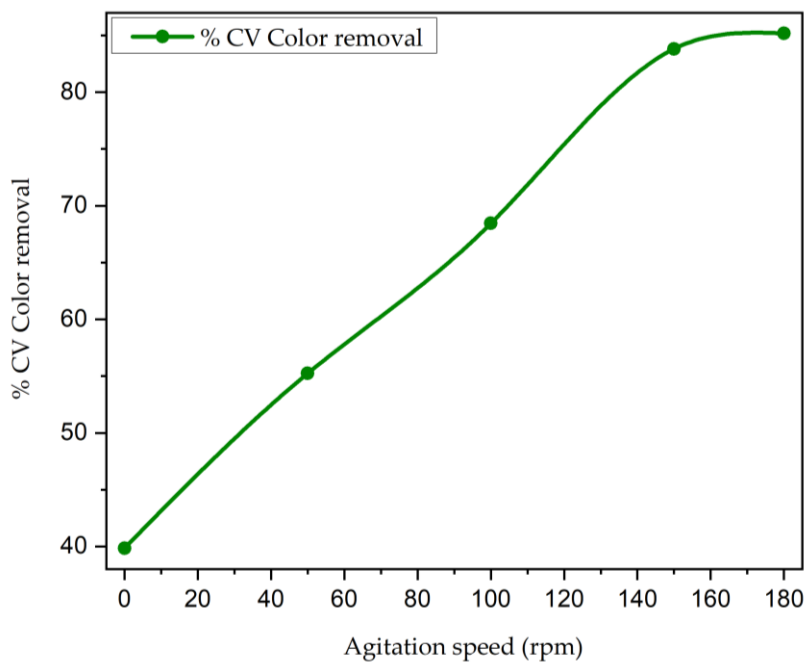

**Figure S5.** Effect of shaking speed on the decolorization of CV dye using CG-Zn(OH)<sub>2</sub>NPs adsorbent. (Initial pH: 2; initial dye concentration: 200 mg L<sup>-1</sup>; CG-Zn(OH)<sub>2</sub>NPs adsorbent dosage: 6 g L<sup>-1</sup>; adsorbent particle size: 65.38 μm; temperature: 299 K; contact time: 8 h)

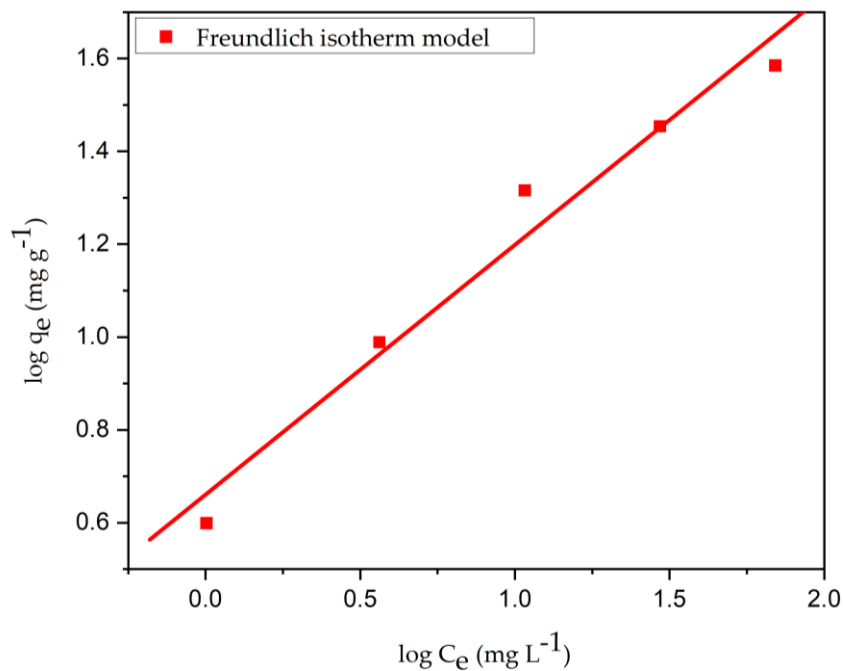

**Figure S6.** Freundlich isotherm plot for decolorization of CV dye using CG-Zn(OH)<sub>2</sub>NPs adsorbent. (Initial pH: 2; initial dye concentration: 25–300 mg L<sup>-1</sup>; CG-Zn(OH)<sub>2</sub>NPs adsorbent dosage: 6 g L<sup>-1</sup>; adsorbent particle size: 78  $\mu$ m; shaking speed: 150 rpm; temperature: 299 K; contact time: 24 h)

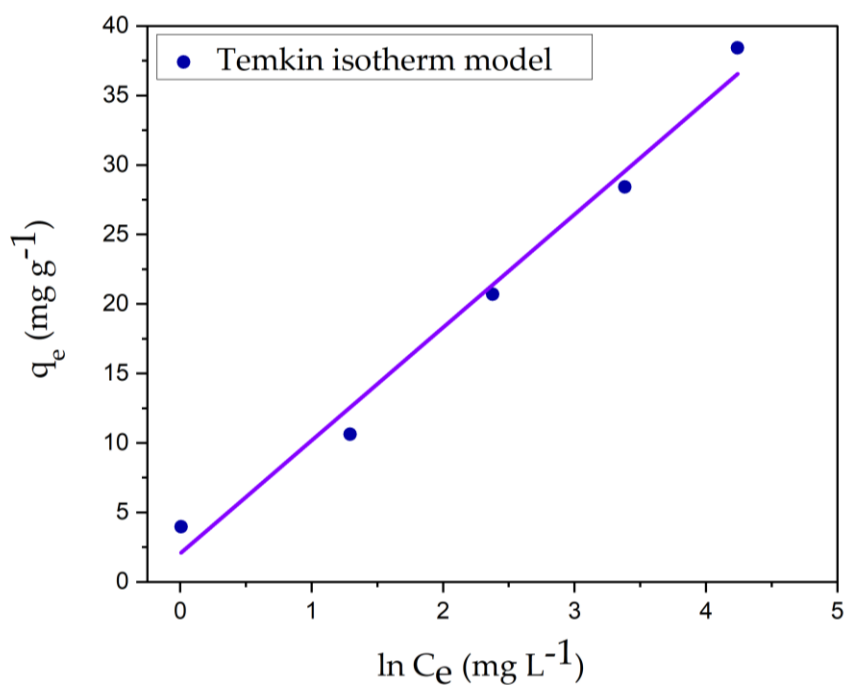

**Figure S7.** Temkin isotherm plot for decolorization of CV dye using CG-Zn(OH)<sub>2</sub>NPs adsorbent. (Initial pH: 2; initial dye concentration: 25–300 mg L<sup>-1</sup>; CG-Zn(OH)<sub>2</sub>NPs adsorbent dosage: 6 g L<sup>-1</sup>; adsorbent particle size: 78  $\mu$ m; shaking speed: 150 rpm; temperature: 299 K; contact time: 24 h)

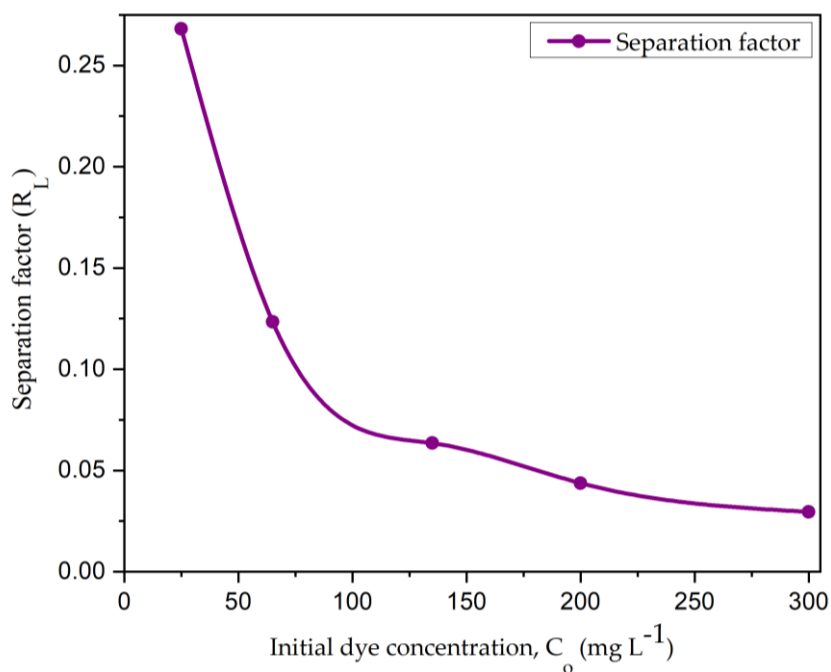

**Figure S8.** Separation factor for decolorization of CV dye using CG-Zn(OH)<sub>2</sub>NPs adsorbent. (Initial pH: 2; initial dye concentration: 25–300 mg L<sup>-1</sup>; CG-Zn(OH)<sub>2</sub>NPs adsorbent dosage: 6 g L<sup>-1</sup>; adsorbent particle size: 78  $\mu$ m; shaking speed: 150 rpm; temperature: 299 K; contact time: 24 h)

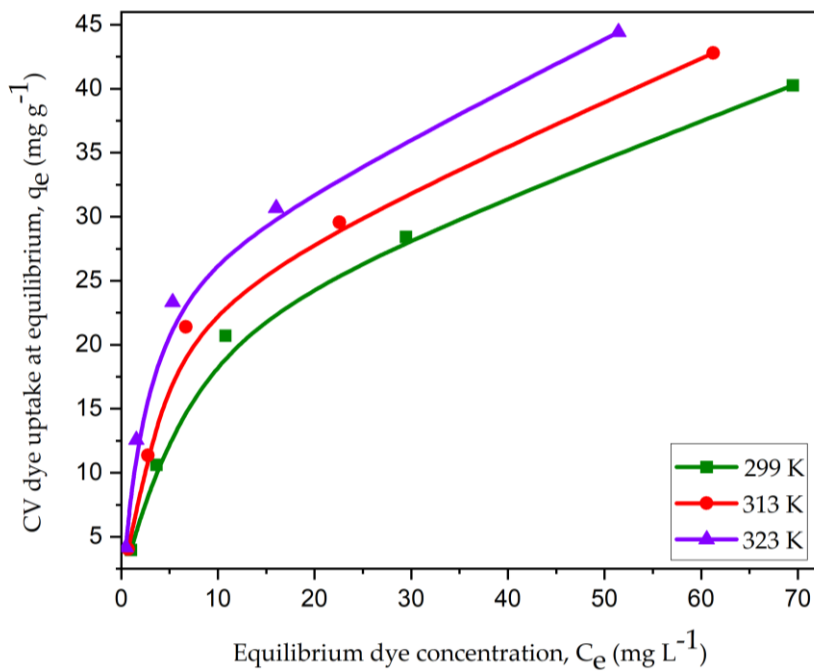

**Figure S9.** Effect of temperature on decolorization of CV dye using CG-Zn(OH)<sub>2</sub>NPs adsorbent. (Initial pH: 2; initial dye concentration: 25–300 mg L<sup>-1</sup>; CG-Zn(OH)<sub>2</sub>NPs adsorbent dosage: 6 g L<sup>-1</sup>; adsorbent particle size: 78  $\mu$ m; shaking speed: 150 rpm; contact time: 24 h)

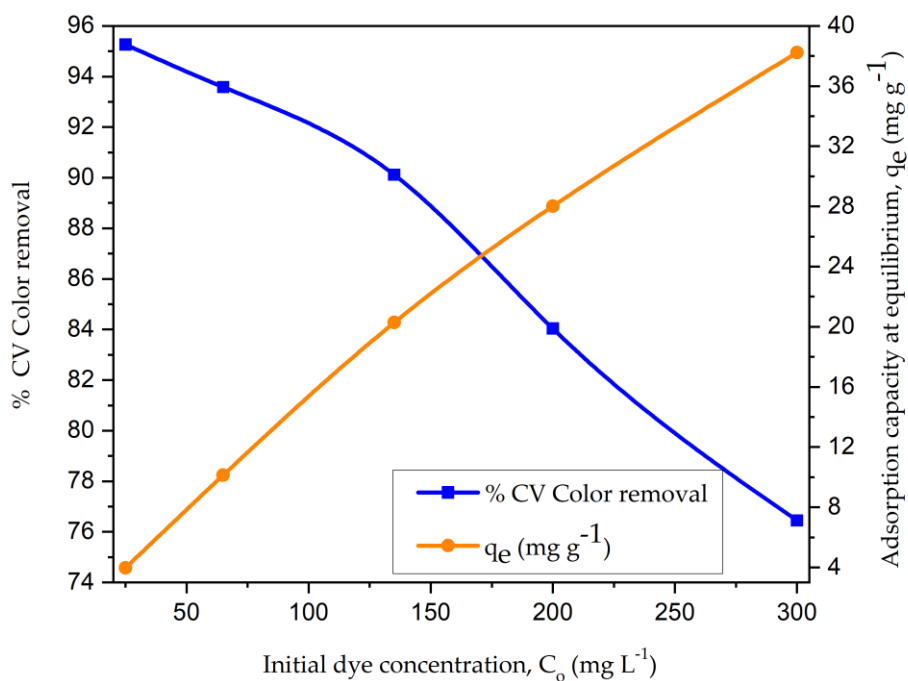

**Figure S10.** Effect of initial dye concentration on decolorization of CV dye using CG-Zn(OH)<sub>2</sub>NPs adsorbent. (Initial pH: 2; CG-Zn(OH)<sub>2</sub>NPs adsorbent dosage: 6 g L<sup>-1</sup>; adsorbent particle size: 78  $\mu\text{m}$ ; shaking speed: 150 rpm; contact time: 24 h)

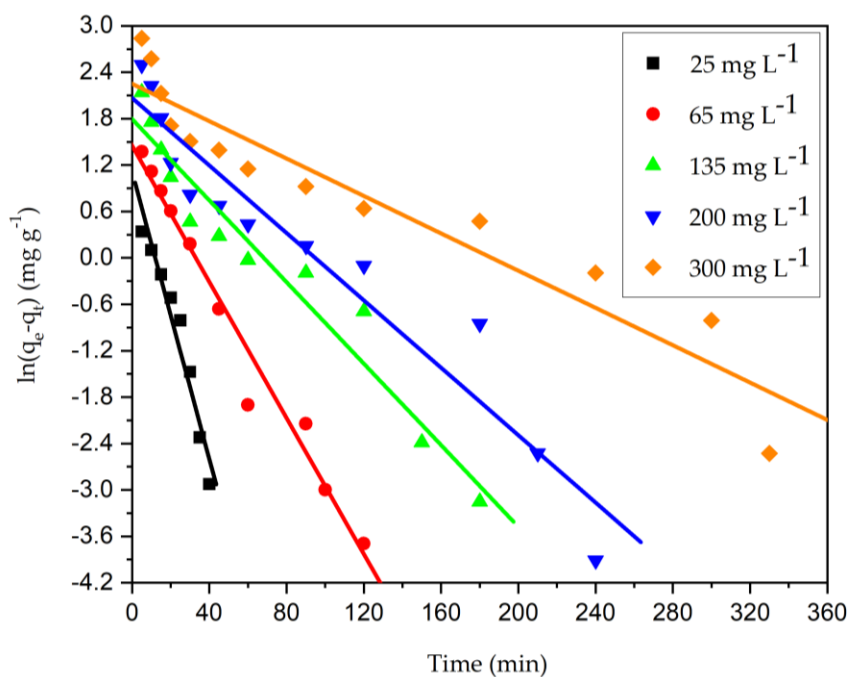

**Figure S11.** Lagergren pseudo-first-order kinetic plot for decolorization of CV dye using CG-Zn(OH)<sub>2</sub>NPs adsorbent. (Initial pH: 2; initial dye concentration: 25–300  $\text{mg L}^{-1}$ ; CG-Zn(OH)<sub>2</sub>NPs adsorbent dosage: 6 g L<sup>-1</sup>; adsorbent particle size: 78  $\mu\text{m}$ ; shaking speed: 150 rpm; temperature: 299 K; contact time: 24 h)

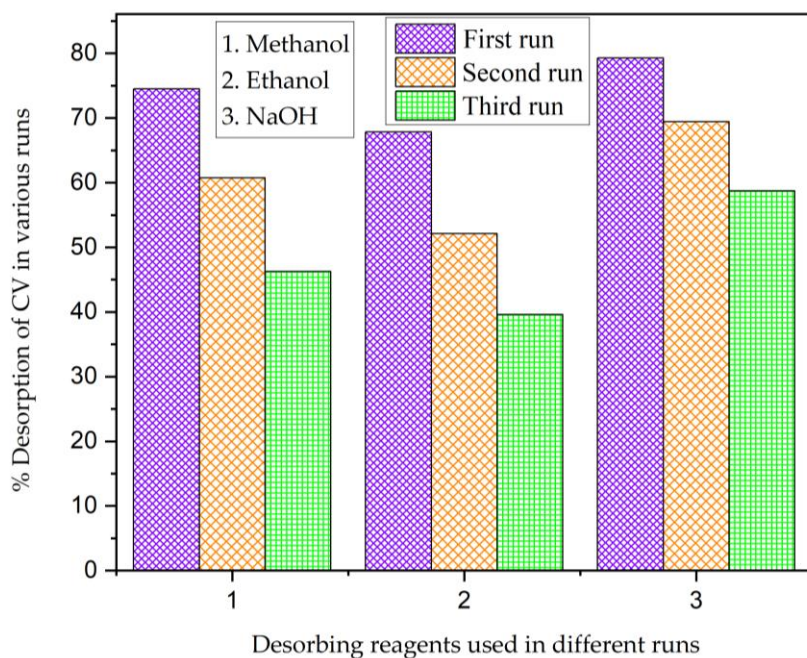

**Figure S12.** Desorption efficiency of CV dye from CG-Zn(OH)<sub>2</sub>NPs loaded adsorbent in various runs. (Volume of desorbing reagent: 100 mL; shaking speed: 150 rpm; temperature: 299 K; contact time: 24 h)

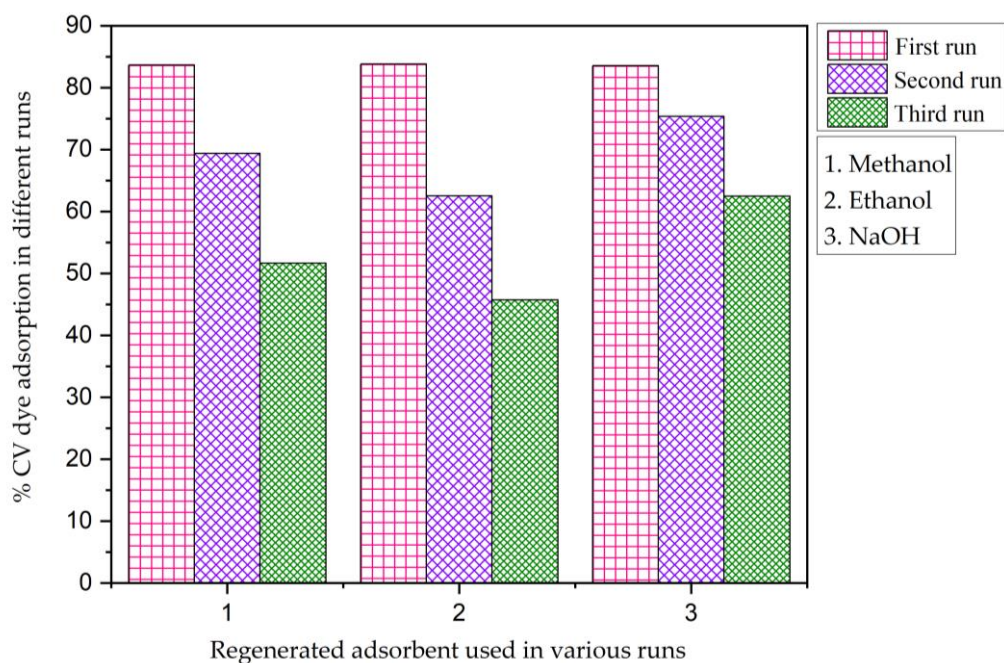

**Figure S13.** Reusability of CG-Zn(OH)<sub>2</sub>NPs adsorbent for the decolorization of CV dye in various runs. (Initial pH: 2; initial dye concentration: 200 mg L<sup>-1</sup>; volume of dye solution: 100 mL; shaking speed: 150 rpm; temperature: 299 K; contact time: 24 h)

**Table S1.** Activation energy for the decolorization of CV dye onto CG-Zn(OH)<sub>2</sub>NPs adsorbent at various initial dye concentrations.

| Initial dye concentration, C <sub>0</sub> (mg L <sup>-1</sup> ) | Activation energy, E <sub>a</sub> (kJ mole <sup>-1</sup> ) |
|-----------------------------------------------------------------|------------------------------------------------------------|
| 25                                                              | 45.927                                                     |
| 65                                                              | 44.432                                                     |
| 135                                                             | 43.836                                                     |
| 200                                                             | 40.826                                                     |
| 300                                                             | 40.089                                                     |
